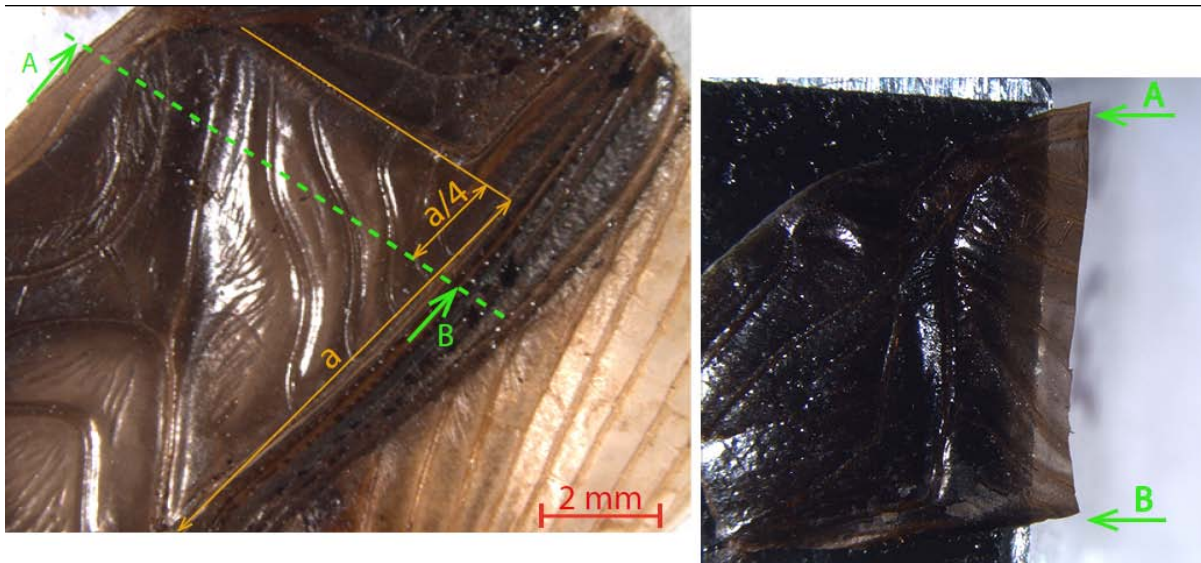

**Fig. S1.** Details of processing cricket forewings for measurement of harp thickness showing the axis along which the harp was cut.

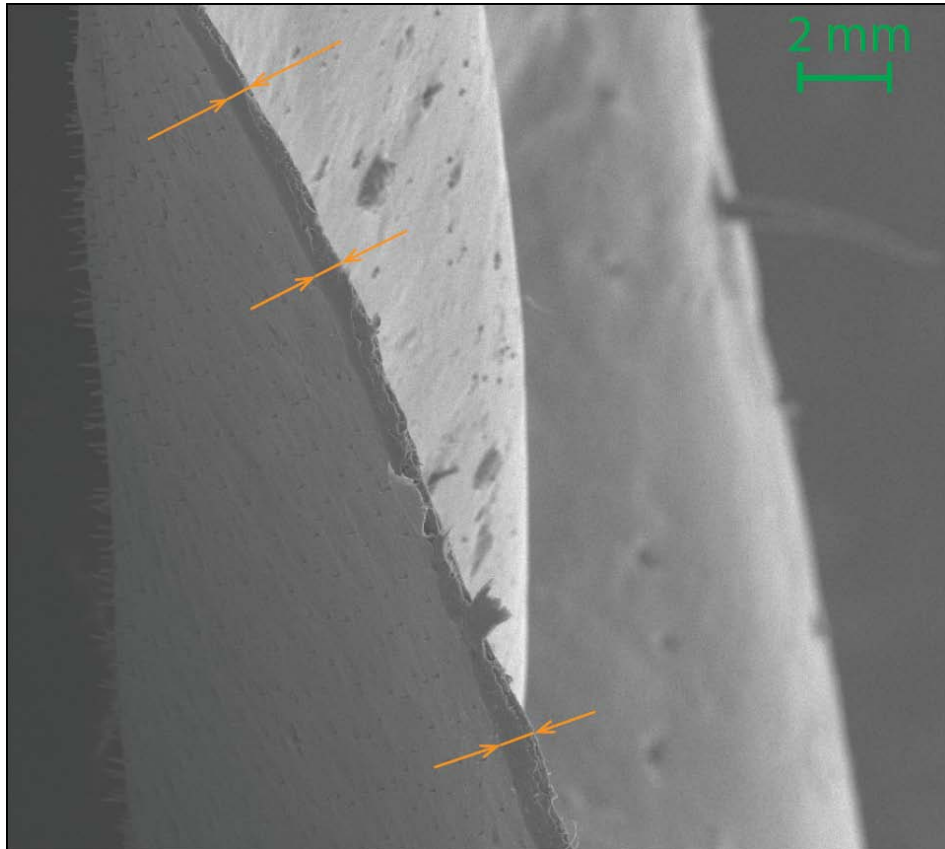

**Fig. S2.** SEM image of a transversely sectioned harp for thickness measurement.

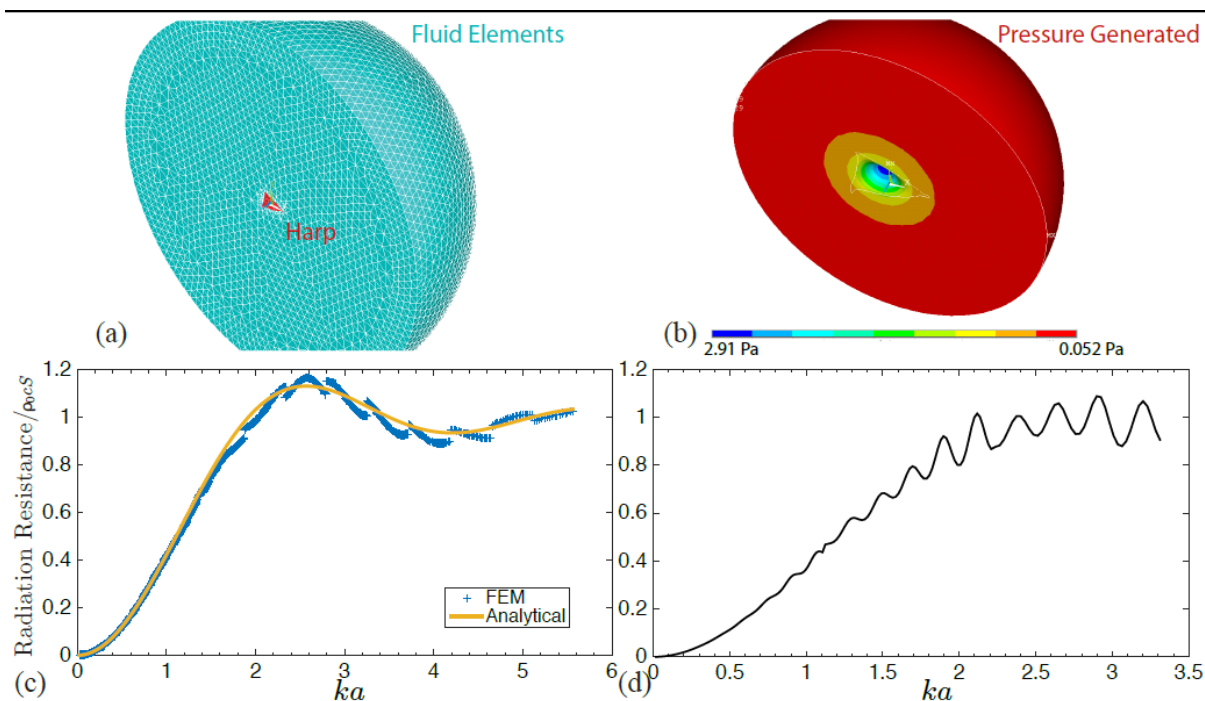

**Fig. S3.** FEM acoustic simulation: (a) FE model showing the acoustic elements surrounding the harp, (b) simulated sound pressure radiated from the harp, (c) simulated and analytical results of radiation efficiency (radiation resistance/ $\rho_0 c S$ ) from a circular piston (where,  $\rho_0$  is the density of air,  $c$  is the speed of sound in air and  $S$  is the area of the radiating source), and (d) simulated radiation efficiency (radiation resistance/ $\rho_0 c S$ ) from the harp.

**Table S1.** Stridulation energetics at high frequencies: Details of calculations leading to values shown in Table 4 of manuscript. In these energetics calculations, we have travelled along two extreme directions - one, where we have kept the thickness constant and decreased the harp area and the other where we have kept the harp area constant and increased the harp thickness.

| To achieve a song frequency of 20kHz             |                                  |                                      |                                                  |  |                |                                                                           |                                                       |                |                                                                                                                                                            |                                                                                                                                                            |                                  |                                                                                                                                                                                              |                                                   |                                                                                                                                                                                              |
|--------------------------------------------------|----------------------------------|--------------------------------------|--------------------------------------------------|--|----------------|---------------------------------------------------------------------------|-------------------------------------------------------|----------------|------------------------------------------------------------------------------------------------------------------------------------------------------------|------------------------------------------------------------------------------------------------------------------------------------------------------------|----------------------------------|----------------------------------------------------------------------------------------------------------------------------------------------------------------------------------------------|---------------------------------------------------|----------------------------------------------------------------------------------------------------------------------------------------------------------------------------------------------|
| Increasing Harp thickness, keeping size constant |                                  |                                      |                                                  |  |                |                                                                           |                                                       |                |                                                                                                                                                            |                                                                                                                                                            |                                  |                                                                                                                                                                                              |                                                   |                                                                                                                                                                                              |
| Species                                          | Fold-change in rotational energy | Fold increase in stridulation energy | 0.7*rotation al energy + 0.3*stridulation energy |  | Song Frequency | Fold change of thickness = Fold change of mass                            |                                                       | Plectrum Speed | Fold change in rotational speed =120 (since this is plectrum speed needed to excite a file with tooth spacing of 12microns at 20kHz)/scaled plectrum speed | Fold change in rotational energy                                                                                                                           | Tooth spacing                    | Fold change in stridulation energy (if tooth spacing becomes 12microns from a larger spacing, more teeth need to be struck, proportionately increasing the energy required for stridulation) |                                                   |                                                                                                                                                                                              |
| <i>Gryllodes sp.</i>                             | 11.70                            | 1.8                                  | 8.73                                             |  | 5.88           | 3.40                                                                      |                                                       | 64.7           | 1.85                                                                                                                                                       | 11.70                                                                                                                                                      | 22                               | 1.8                                                                                                                                                                                          |                                                   |                                                                                                                                                                                              |
| <i>T. portentosus</i>                            | 1.47                             | 8.8                                  | 3.67                                             |  | 4.12           | 4.85                                                                      |                                                       | 218            | 0.55                                                                                                                                                       | 1.47                                                                                                                                                       | 106                              | 8.8                                                                                                                                                                                          |                                                   |                                                                                                                                                                                              |
| <i>G. bimaculatus</i>                            | 7.19                             | 3                                    | 5.94                                             |  | 4.98           | 4.02                                                                      |                                                       | 89.7           | 1.34                                                                                                                                                       | 7.19                                                                                                                                                       | 36                               | 3.0                                                                                                                                                                                          |                                                   |                                                                                                                                                                                              |
| Decreasing Harp size, keeping thickness constant |                                  |                                      |                                                  |  |                |                                                                           |                                                       |                |                                                                                                                                                            |                                                                                                                                                            |                                  |                                                                                                                                                                                              |                                                   |                                                                                                                                                                                              |
|                                                  | Fold-change in rotational energy | Fold increase in stridulation energy | 0.7*rotation al energy + 0.3*stridulation energy |  | Song Frequency | Fold change of Area (current song frequency/10 kHz) = Fold change of mass | Fold change in size (square root of area fold change) | Plectrum Speed | Scaled plectrum speed (due to scaled plectrum radius)                                                                                                      | Fold change in rotational speed =120 (since this is plectrum speed needed to excite a file with tooth spacing of 12microns at 20kHz)/scaled plectrum speed | Fold change in rotational energy | Tooth spacing                                                                                                                                                                                | Scaled file spacing (assuming allometric scaling) | Fold change in stridulation energy (if tooth spacing becomes 12microns from a larger spacing, more teeth need to be struck, proportionately increasing the energy required for stridulation) |
| <i>Gryllodes sp.</i>                             | 3.44                             | 1                                    | 2.71                                             |  | 5.88           | 0.29                                                                      | 0.54221767                                            | 64.7           | 35.08148315                                                                                                                                                | 3.42                                                                                                                                                       | 3.44                             | 22                                                                                                                                                                                           | 11.92878871                                       | 1.0                                                                                                                                                                                          |
| <i>T. portentosus</i>                            | 0.3                              | 4                                    | 1.41                                             |  | 4.12           | 0.21                                                                      | 0.45387223                                            | 218            | 98.94414586                                                                                                                                                | 1.21                                                                                                                                                       | 0.30                             | 106                                                                                                                                                                                          | 48.11045624                                       | 4                                                                                                                                                                                            |
| <i>G. bimaculatus</i>                            | 1.79                             | 1.5                                  | 1.70                                             |  | 4.98           | 0.25                                                                      | 0.498999                                              | 89.7           | 44.76021012                                                                                                                                                | 2.68                                                                                                                                                       | 1.79                             | 36                                                                                                                                                                                           | 17.96396393                                       | 1.5                                                                                                                                                                                          |
|                                                  |                                  |                                      |                                                  |  |                |                                                                           |                                                       |                |                                                                                                                                                            |                                                                                                                                                            |                                  |                                                                                                                                                                                              |                                                   |                                                                                                                                                                                              |
|                                                  |                                  |                                      |                                                  |  |                |                                                                           |                                                       |                |                                                                                                                                                            |                                                                                                                                                            |                                  |                                                                                                                                                                                              |                                                   |                                                                                                                                                                                              |
| To achieve a song frequency of 10kHz             |                                  |                                      |                                                  |  |                |                                                                           |                                                       |                |                                                                                                                                                            |                                                                                                                                                            |                                  |                                                                                                                                                                                              |                                                   |                                                                                                                                                                                              |
| Increasing Harp thickness, keeping size constant |                                  |                                      |                                                  |  |                |                                                                           |                                                       |                |                                                                                                                                                            |                                                                                                                                                            |                                  |                                                                                                                                                                                              |                                                   |                                                                                                                                                                                              |
|                                                  | Fold-change in rotational energy | Fold increase in stridulation energy | 0.7*rotation al energy + 0.3*stridulation energy |  | Song Frequency | Fold change of thickness = Fold change of mass                            |                                                       | Plectrum Speed | Fold change in rotational speed =120 (since this is plectrum speed needed to excite a file with tooth spacing of 12microns at 20kHz)/scaled plectrum speed | Fold change in rotational energy                                                                                                                           | Tooth spacing                    | Fold change in stridulation energy (if tooth spacing becomes 12microns from a larger spacing, more teeth need to be struck, proportionately increasing the energy required for stridulation) |                                                   |                                                                                                                                                                                              |
| <i>Gryllodes sp.</i>                             | 1.46                             | 1.8                                  | 1.56                                             |  | 5.88           | 1.70                                                                      |                                                       | 64.7           | 0.93                                                                                                                                                       | 1.46                                                                                                                                                       | 22                               | 1.8                                                                                                                                                                                          |                                                   |                                                                                                                                                                                              |
| <i>T. portentosus</i>                            | 0.18                             | 8.8                                  | 2.77                                             |  | 4.12           | 2.43                                                                      |                                                       | 218            | 0.28                                                                                                                                                       | 0.18                                                                                                                                                       | 106                              | 8.8                                                                                                                                                                                          |                                                   |                                                                                                                                                                                              |
| <i>G. bimaculatus</i>                            | 0.9                              | 3                                    | 1.53                                             |  | 4.98           | 2.01                                                                      |                                                       | 89.7           | 0.67                                                                                                                                                       | 0.90                                                                                                                                                       | 36                               | 3.0                                                                                                                                                                                          |                                                   |                                                                                                                                                                                              |
| Decreasing Harp size, keeping thickness constant |                                  |                                      |                                                  |  |                |                                                                           |                                                       |                |                                                                                                                                                            |                                                                                                                                                            |                                  |                                                                                                                                                                                              |                                                   |                                                                                                                                                                                              |
|                                                  | Fold-change in rotational energy | Fold increase in stridulation energy | 0.7*rotation al energy + 0.3*stridulation energy |  | Song Frequency | Fold change of Area (current song frequency/10 kHz) = Fold change of mass | Fold change in size (square root of area fold change) | Plectrum Speed | Scaled plectrum speed (due to scaled plectrum radius)                                                                                                      | Fold change in rotational speed =120 (since this is plectrum speed needed to excite a file with tooth spacing of 12microns at 20kHz)/scaled plectrum speed | Fold change in rotational energy | Tooth spacing                                                                                                                                                                                | Scaled file spacing (assuming allometric scaling) | Fold change in stridulation energy (if tooth spacing becomes 12microns from a larger spacing, more teeth need to be struck, proportionately increasing the energy required for stridulation) |
| <i>Gryllodes sp.</i>                             | 0.86                             | 1.41                                 | 1.03                                             |  | 5.88           | 0.59                                                                      | 0.76681158                                            | 64.7           | 49.61270926                                                                                                                                                | 1.21                                                                                                                                                       | 0.86                             | 22                                                                                                                                                                                           | 16.86985477                                       | 1.41                                                                                                                                                                                         |
| <i>T. portentosus</i>                            | 0.08                             | 5.67                                 | 1.76                                             |  | 4.12           | 0.41                                                                      | 0.64187226                                            | 218            | 139.928153                                                                                                                                                 | 0.43                                                                                                                                                       | 0.08                             | 106                                                                                                                                                                                          | 68.03845971                                       | 5.67                                                                                                                                                                                         |
| <i>G. bimaculatus</i>                            | 0.45                             | 2.12                                 | 0.95                                             |  | 4.98           | 0.50                                                                      | 0.70569115                                            | 89.7           | 63.30049621                                                                                                                                                | 0.95                                                                                                                                                       | 0.45                             | 36                                                                                                                                                                                           | 25.40488142                                       | 2.12                                                                                                                                                                                         |

**Table S2.** In these energetics calculations, we have investigated an intermediate combination of thickness increase together with decreased harp size to arrive at the energy required to call at 20kHz and 10kHz.

| To achieve a song frequency of 20kHz                     |                                  |                                      |                                                 |                |                          |                     |                                                                      |                                                       |                |                                                       |                                                                                                                                                            |                                  |               |                                                   |                                                                                                                                                                                              |
|----------------------------------------------------------|----------------------------------|--------------------------------------|-------------------------------------------------|----------------|--------------------------|---------------------|----------------------------------------------------------------------|-------------------------------------------------------|----------------|-------------------------------------------------------|------------------------------------------------------------------------------------------------------------------------------------------------------------|----------------------------------|---------------|---------------------------------------------------|----------------------------------------------------------------------------------------------------------------------------------------------------------------------------------------------|
| Decreasing Harp size, and increasing thickness 2 fold    |                                  |                                      |                                                 |                |                          |                     |                                                                      |                                                       |                |                                                       |                                                                                                                                                            |                                  |               |                                                   |                                                                                                                                                                                              |
|                                                          | Fold-change in rotational energy | Fold increase in stridulation energy | 0.7*rotational energy + 0.3*stridulation energy | Song Frequency | Fold change of thickness | Fold change of Area | Fold change of Mass = Fold change of thickness * Fold change of Area | Fold change in size (square root of area fold change) | Plectrum Speed | Scaled plectrum speed (due to scaled plectrum radius) | Fold change in rotational speed =120 (since this is plectrum speed needed to excite a file with tooth spacing of 12microns at 20kHz)/scaled plectrum speed | Fold change in rotational energy | Tooth spacing | Scaled file spacing (assuming allometric scaling) | Fold change in stridulation energy (if tooth spacing becomes 12microns from a larger spacing, more teeth need to be struck, proportionately increasing the energy need for stridulation)     |
| Grylloides sp.                                           | 6.88                             | 1.4                                  | 5.24                                            | 5.88           | 2                        | 0.50                | 1.18                                                                 | 0.766812                                              | 64.7           | 49.61270926                                           | 2.42                                                                                                                                                       | 6.88                             | 22            | 16.86985477                                       | 1.4                                                                                                                                                                                          |
| T.portentosus                                            | 0.81                             | 5.7                                  | 2.13                                            | 4.12           | 2                        | 0.41                | 0.82                                                                 | 0.641872                                              | 218            | 139.928153                                            | 0.86                                                                                                                                                       | 0.61                             | 106           | 68.03845971                                       | 5.7                                                                                                                                                                                          |
| G.bimaculatus                                            | 3.58                             | 2.1                                  | 3.14                                            | 4.98           | 2                        | 0.50                | 1.00                                                                 | 0.705691                                              | 89.7           | 63.30049621                                           | 1.90                                                                                                                                                       | 3.58                             | 36            | 25.40488142                                       | 2.1                                                                                                                                                                                          |
| Decreasing Harp size 0.6 fold, and increasing thickness  |                                  |                                      |                                                 |                |                          |                     |                                                                      |                                                       |                |                                                       |                                                                                                                                                            |                                  |               |                                                   |                                                                                                                                                                                              |
| Grylloides sp.                                           | 7.02                             | 1.4                                  | 5.34                                            | 5.88           | 2.04                     | 0.60                | 1.22                                                                 | 0.774597                                              | 64.7           | 50.1164045                                            | 2.39                                                                                                                                                       | 7.02                             | 22            | 17.04112672                                       | 1.4                                                                                                                                                                                          |
| T.portentosus                                            | 0.88                             | 6.8                                  | 2.67                                            | 4.12           | 2.91                     | 0.60                | 1.75                                                                 | 0.774597                                              | 218            | 168.8620739                                           | 0.71                                                                                                                                                       | 0.88                             | 106           | 82.10724694                                       | 6.8                                                                                                                                                                                          |
| G.bimaculatus                                            | 4.31                             | 2.3                                  | 3.72                                            | 4.98           | 2.41                     | 0.60                | 1.45                                                                 | 0.774597                                              | 89.7           | 69.48132123                                           | 1.73                                                                                                                                                       | 4.31                             | 36            | 27.88548009                                       | 2.3                                                                                                                                                                                          |
| To achieve a song frequency of 10kHz                     |                                  |                                      |                                                 |                |                          |                     |                                                                      |                                                       |                |                                                       |                                                                                                                                                            |                                  |               |                                                   |                                                                                                                                                                                              |
| Decreasing Harp size, and increasing thickness 1.5 fold  |                                  |                                      |                                                 |                |                          |                     |                                                                      |                                                       |                |                                                       |                                                                                                                                                            |                                  |               |                                                   |                                                                                                                                                                                              |
|                                                          | Fold-change in rotational energy | Fold increase in stridulation energy | 0.7*rotational energy + 0.3*stridulation energy | Song Frequency | Fold change of thickness | Fold change of Area | Fold change of Mass = Fold change of thickness * Fold change of Area | Fold change in size (square root of area fold change) | Plectrum Speed | Scaled plectrum speed (due to scaled plectrum radius) | Fold change in rotational speed =60 (since this is plectrum speed needed to excite a file with tooth spacing of 12microns at 10kHz)/scaled plectrum speed  | Fold change in rotational energy | Tooth spacing | Scaled file spacing (assuming allometric scaling) | Fold change in stridulation energy (if tooth spacing becomes 12microns from a larger spacing, more teeth need to be struck, proportionately increasing the energy required for stridulation) |
| Grylloides sp.                                           | 1.29                             | 1.7                                  | 1.42                                            | 5.88           | 1.5                      | 0.88                | 1.32                                                                 | 0.939149                                              | 64.7           | 60.76291122                                           | 0.99                                                                                                                                                       | 1.29                             | 22            | 20.66126811                                       | 1.7                                                                                                                                                                                          |
| T.portentosus                                            | 0.11                             | 6.9                                  | 2.16                                            | 4.12           | 1.5                      | 0.62                | 0.93                                                                 | 0.78613                                               | 218            | 171.3762877                                           | 0.35                                                                                                                                                       | 0.11                             | 106           | 83.32975459                                       | 6.9                                                                                                                                                                                          |
| G.bimaculatus                                            | 0.87                             | 2.8                                  | 1.25                                            | 4.98           | 1.5                      | 0.75                | 1.12                                                                 | 0.864292                                              | 89.7           | 77.52695809                                           | 0.77                                                                                                                                                       | 0.67                             | 36            | 31.11449823                                       | 2.8                                                                                                                                                                                          |
| Decreasing Harp size 0.75 fold, and increasing thickness |                                  |                                      |                                                 |                |                          |                     |                                                                      |                                                       |                |                                                       |                                                                                                                                                            |                                  |               |                                                   |                                                                                                                                                                                              |
| Grylloides sp.                                           | 1.10                             | 1.6                                  | 1.24                                            | 5.88           | 1.28                     | 0.75                | 0.96                                                                 | 0.866025                                              | 64.7           | 56.03184362                                           | 1.07                                                                                                                                                       | 1.10                             | 22            | 19.05255888                                       | 1.6                                                                                                                                                                                          |
| T.portentosus                                            | 0.14                             | 7.8                                  | 2.39                                            | 4.12           | 1.82                     | 0.75                | 1.37                                                                 | 0.866025                                              | 218            | 188.793538                                            | 0.32                                                                                                                                                       | 0.14                             | 106           | 91.7986928                                        | 7.8                                                                                                                                                                                          |
| G.bimaculatus                                            | 0.87                             | 2.8                                  | 1.25                                            | 4.98           | 1.51                     | 0.75                | 1.13                                                                 | 0.866025                                              | 89.7           | 77.68247872                                           | 0.77                                                                                                                                                       | 0.67                             | 36            | 31.17691454                                       | 2.8                                                                                                                                                                                          |
